# Supplementary material
Source: Springer Nature journal article supplement (https://www.springermedizin.de/resource/supplementary/13023_2013_600_MOESM5_ESM.pdf/9642826)
Supplement: MOESM5 [file 9642826]

|     |                                                                             |         |              |
|-----|-----------------------------------------------------------------------------|---------|--------------|
| 1   | MESTLGAGIVIAEALQNQLAWLENVLWITFLGDPKILFLFYFPAAYYASRRVGI AVLWI                | 60      | G6PC3_HUMAN  |
| 1   | MESTLSAGIIMA EALQNRLPGL ENMWLVWTF LGDPKNLFQFCFPAAYYASRRLGISVLWI             | 60      | G6PC3_MOUSE  |
| 1   | MESLYRQGVWMAEALQQNSR SLEDLWLVASHMGDPKAAVLLVFPVVFYIHRRTGIAVLWV               | 60      | G6PC3_DANRE  |
| 1   | MDVLHSSGVVLAAYLQEKCLDFSQFWLWVNHLGDP AHIYVIYFPLAYCICNRLGVAILWT               | 60      | F6RB07_XENTR |
|     | *: * : * ** : . : . : . ** . : . * * : : : *                                |         |              |
|     |                                                                             | 44      |              |
| 61  | SLITEWLNLI FKWFLFGDRPFWWVHESGYYSQAPAQVHQFPSSCETGPGSPSGHCMITGA               | 120     | G6PC3_HUMAN  |
| 61  | TFIAEWLNLVFKWFLFGDRPFWWVHESGYSTQTPIQIHQFPSSCETGPGSPSGHCMITGA                | 120     | G6PC3_MOUSE  |
| 61  | AALSEWLNLVFKWILFGERPYWWIGQSGLFSEKPPVQQFQSTCESGPGSPSGHAMV TSA                | 120     | G6PC3_DANRE  |
| 61  | GLLSEWLNLI FKWFLFGERPFWWIYESGMHSD--LHLTQFPLTCETGPGNPSGHCMITGA               | 118     | F6RB07_XENTR |
|     | : : * * * * * : * * * * * : * * : : : * * : * * * * * . * * * * * : * * . * |         |              |
|     |                                                                             | 116 118 |              |
| 121 | ALWPIMTALSSQVATRARSRWVRVMP SLAYCTFLLAVGLSRIFILAHFPHQVLAGLITGA               | 180     | G6PC3_HUMAN  |
| 121 | ALWPVMTAISSQVASRSRSPWVRVIPGLAYCTFLLAVGLSRVFLLAHFPHQVLGGLIVGA                | 180     | G6PC3_MOUSE  |
| 121 | VWVVIISSLASFQAYTGSKILSAVLYLLYAVFLGCVGLSRIFILAHFPHQVVAGLLTGV                 | 180     | G6PC3_DANRE  |
| 119 | ALWPVMMFFTNL---RPQRTLLSLVPIILYIMLMVGVAISRVLILAHFPHQVVAGLIAGM                | 175     | F6RB07_XENTR |
|     | . * : : : . : : : * : : * . : * * * * * : * * * * * : * * * * *             |         |              |
|     |                                                                             | 154 161 |              |
| 181 | VLGWLMTPRVPMERELSFYGLTALALMLGTSLIYWTLFTLGLDLSWSISLAFKWCERPEW                | 240     | G6PC3_HUMAN  |
| 181 | ALGWLMSPRVPMERELSFYGLTALALMLGASLMYWTLFTLGLDLSWSINLASKWCERPEW                | 240     | G6PC3_MOUSE  |
| 181 | LLGVFLKRSVPERRPLLFRRFSMALLGAALIFHAVLEKTGIDLSWSISLAKRWCSRSEW                 | 240     | G6PC3_DANRE  |
| 176 | YLGHSIPGTVSRGCTLLFFTLTSVLLLFGAFLIYFGMGIFGVDLSWSINRATKWCAKPEW                | 235     | F6RB07_XENTR |
|     | ** : * * * : : * : : : : * : * * * * * . * * * : *                          |         |              |
|     |                                                                             | 185 208 |              |
| 241 | IHVDSRPFASLSRDSGAALGLGIALHSPCYAQVRR AQLGNGQKIACLVLAMGLLGPLDWL               | 300     | G6PC3_HUMAN  |
| 241 | VHMDSRPFASLSRDSGSALGLGIALHTPCY AQIRRAHLGNGQKIACFVLAMGLLVFLEWL               | 300     | G6PC3_MOUSE  |
| 241 | VRMDTAPFSSLNRDAGVLLGLGLAQYW---KPGGWTLPRAPRTLCLALSSLALHYISRF                 | 296     | G6PC3_DANRE  |
| 236 | VRLETRPFSSVTRSAASALGLGFAFRCP LYSRLCKGNRDWRKRTITLLLSLLLGLLHHL                | 295     | F6RB07_XENTR |
|     | : : : : * * * : * . : . * * * * * : : : : * : * * : * : :                   |         |              |
|     |                                                                             | 253 260 |              |
| 301 | GHPP-QISLFYIFNFLKYTLWPCLVLALVPWAVHMFSAQEAPP I HSS                           | 346     | G6PC3_HUMAN  |
| 301 | GYPP-QISLFYIFNFLKYTLWPCLVLALVPWV VHTLSDQEAPP I RSS                          | 346     | G6PC3_MOUSE  |
| 297 | PLPTVPPLLFYSLFFLKYSIVPQVVMVLVPGFVHLLTAKPKRE----                             | 339     | G6PC3_DANRE  |
| 296 | PLQTASPLLFYFLNFI RHVLGPFVAVVILAPFITHSLSMRATDKKE--                           | 340     | F6RB07_XENTR |
|     | ** * : * : : : * * : * . * . * : : :                                        |         |              |
